# Supplementary material for: Design of solvent systems for preparation of ε-CL-20 crystals with high sphericity assisted by molecular simulation
Source: Royal Society of Chemistry journal article supplement (doi:10.1039/d4ce01181c), 2024-12-24
Supplement: d4ce01181c1.pdf [file d4ce01181c1.pdf]

*Supplementary information*

**Design of solvent systems for  $\epsilon$ -CL-20 crystals with high sphericity preparation assisted by molecular simulation**

Hongyu Wang<sup>a</sup>, Guozhao Liu<sup>a</sup>, Guanwen Su<sup>a</sup>, Hongyuan Wei<sup>a</sup>, Leping Dang<sup>a, \*</sup>

<sup>a</sup> *School of Chemical Engineering and Technology, Tianjin University, Tianjin 300072, P. R. China*

\* Corresponding author.

Email address: [dangleping@tju.edu.cn](mailto:dangleping@tju.edu.cn)

Tel/Fax: +86 22 27405754

## 1. Characterization of compound

The nuclear magnetic resonance (NMR) spectra of solvent and compound CL-20 were measured. The CL-20 was dissolved in solvent (Acetone-d<sub>6</sub>, 99.9%, Shanghai Yien Chemical Technology Co., Ltd., China) and analyzed using a NMR (AVANCE III HD 400 MHz, Bruker, Switzerland). The <sup>1</sup>H-NMR spectrum of solvent is shown in **Fig. S1**. There are the peaks with  $\delta$  (chemical shift) = 0 ppm,  $\delta$  = 0.6 ppm,  $\delta$  = 2.1 ppm, and  $\delta$  = 2.8 ppm. The <sup>1</sup>H-NMR spectrum of CL-20 raw material is shown in **Fig. S2**. Compared to **Fig. S1**, there are two additional peaks with  $\delta$  = 8.22 ppm,  $\delta$  = 8.37 ppm in the spectrum, and the ratio of peak area integrals is approximately 2:1. It can be determined that the peak with  $\delta$  = 8.37 ppm originates from part A of CL-20 structure, and the peak with  $\delta$  = 8.22 ppm originates from part B of CL-20 structure. The NMR spectrum of CL-20 measured by Bazaki et al.<sup>S1</sup> is shown in **Fig. S3**. The result indicates that the  $\delta$  of two peaks are approximately 8.4 ppm and 8.2 ppm, respectively. The above NMR spectra are consistent, proving that the compound used in this work is CL-20. There are no other impurities in CL-20 raw material.

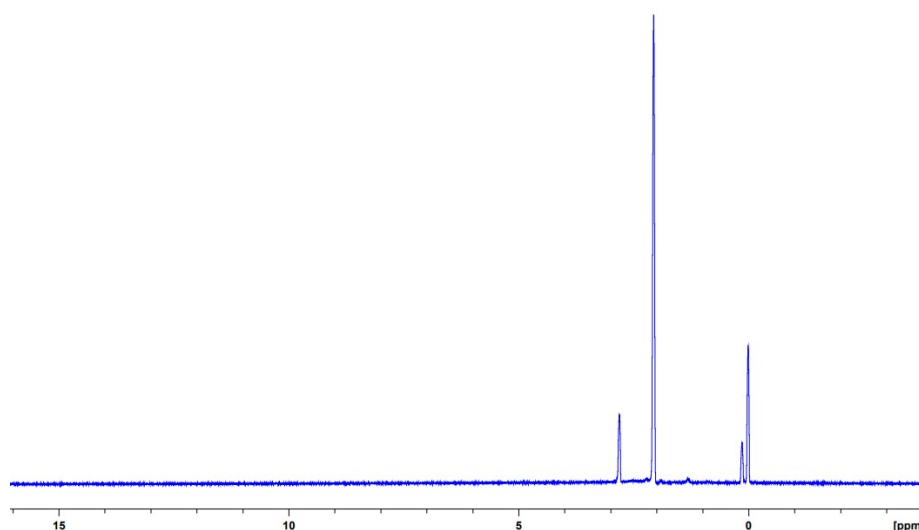

**Fig. S1** <sup>1</sup>H-NMR spectrum of solvent

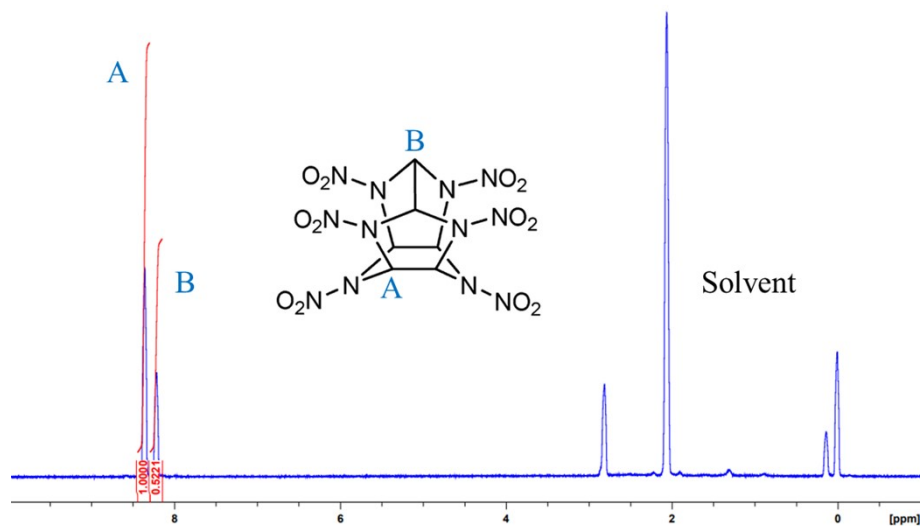

Fig. S2  $^1\text{H-NMR}$  spectrum of CL-20

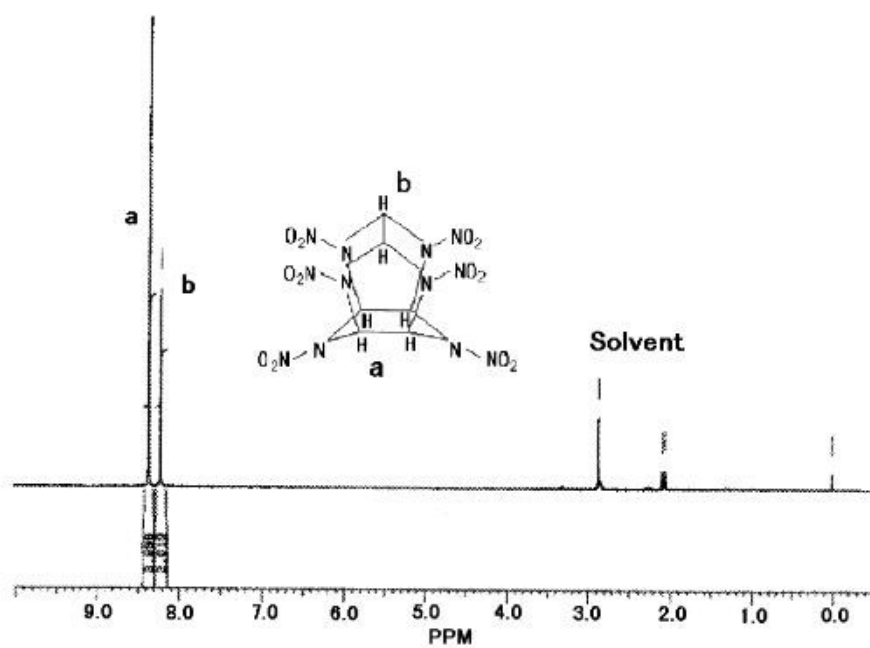

Fig. S3 NMR spectrum of CL-20 measured by H. Bazaki et al.<sup>S1</sup>

In order to make this work more accurate and complete, the CL-20 raw material was analyzed using a High-performance liquid chromatograph (HPLC, 1260 Infinity II, agilent, America). The results indicate that the mass percentage of raw material provided by Beijing Institute of Technology exceeds 99.5%, as shown in **Fig. S4**.

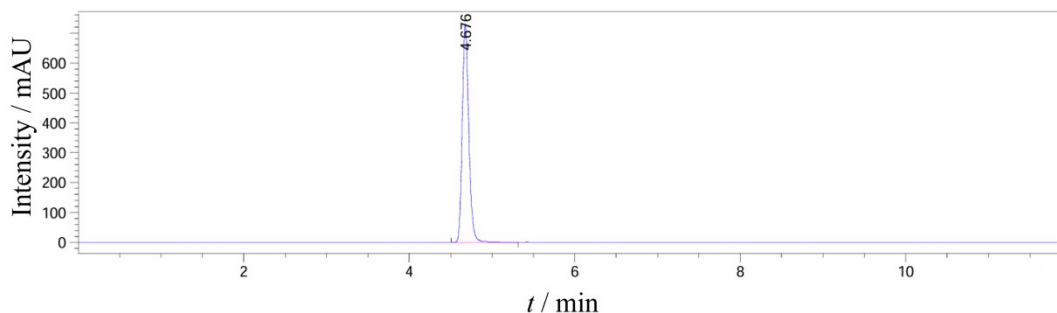

**Fig. S4** HPLC of CL-20 raw material.

## 2. Crystal plane energies and area ratios of $\epsilon$ -CL-20

**Table S1** Crystal plane energies and area ratios of  $\epsilon$ -CL-20 in binary solvents at different temperatures

| $T/K$                          |                                             | (1 1 0) | (0 0 1) | (1 1 -1) | (0 1 1) | (2 0 0) | (2 0 -1) |
|--------------------------------|---------------------------------------------|---------|---------|----------|---------|---------|----------|
| Ethyl acetate + Chlorobenzene  |                                             |         |         |          |         |         |          |
| 303.15                         | $E_{int}/\text{kcal}\cdot\text{mol}^{-1}$   | -330.72 | -476.30 | -415.23  | -485.43 | -325.62 | -490.95  |
|                                | $E_{att}^m/\text{kcal}\cdot\text{mol}^{-1}$ | -12.89  | 16.11   | -25.26   | 14.14   | -57.92  | -24.10   |
|                                | <i>Total facet</i>                          | 47.03   | 18.36   | 0.00     | 30.42   | 0.00    | 4.19     |
|                                | <i>area%</i>                                |         |         |          |         |         |          |
| 313.15                         | $E_{int}/\text{kcal}\cdot\text{mol}^{-1}$   | -336.54 | -463.23 | -425.57  | -478.87 | -340.77 | -525.29  |
|                                | $E_{att}^m/\text{kcal}\cdot\text{mol}^{-1}$ | -11.59  | 13.20   | -23.57   | 12.62   | -56.20  | -17.93   |
|                                | <i>Total facet</i>                          | 55.35   | 9.49    | 0.00     | 29.08   | 0.00    | 6.10     |
|                                | <i>area%</i>                                |         |         |          |         |         |          |
| 323.15                         | $E_{int}/\text{kcal}\cdot\text{mol}^{-1}$   | -342.07 | -441.69 | -434.62  | -463.64 | -350.38 | -537.43  |
|                                | $E_{att}^m/\text{kcal}\cdot\text{mol}^{-1}$ | -10.35  | 8.42    | -22.10   | 9.10    | -55.11  | -15.75   |
|                                | <i>Total facet</i>                          | 57.66   | 3.93    | 0.00     | 35.91   | 0.00    | 2.49     |
|                                | <i>area%</i>                                |         |         |          |         |         |          |
| Ethyl acetate + Dibromomethane |                                             |         |         |          |         |         |          |
| 303.15                         | $E_{int}/\text{kcal}\cdot\text{mol}^{-1}$   | -340.35 | -515.25 | -480.73  | -531.54 | -332.52 | -453.39  |
|                                | $E_{att}^m/\text{kcal}\cdot\text{mol}^{-1}$ | -10.74  | 24.77   | -14.57   | 24.79   | -57.14  | -30.85   |
|                                | <i>Total facet</i>                          | 63.40   | 2.96    | 33.64    | 0.00    | 0.00    | 0.00     |

|                                             |                                                             |         |         |         |         |         |         |
|---------------------------------------------|-------------------------------------------------------------|---------|---------|---------|---------|---------|---------|
| <i>area/%</i>                               |                                                             |         |         |         |         |         |         |
| 313.15                                      | $E_{\text{int}}/\text{kcal}\cdot\text{mol}^{-1}$            | -345.90 | -495.28 | -492.70 | -532.11 | -341.91 | -468.56 |
|                                             | $E_{\text{att}}^{\text{m}}/\text{kcal}\cdot\text{mol}^{-1}$ | -9.50   | 20.33   | -12.61  | 24.92   | -56.07  | -28.13  |
|                                             | <i>Total facet</i>                                          | 64.94   | 0.92    | 34.14   | 0.00    | 0.00    | 0.00    |
| <i>area/%</i>                               |                                                             |         |         |         |         |         |         |
| 323.15                                      | $E_{\text{int}}/\text{kcal}\cdot\text{mol}^{-1}$            | -347.63 | -480.25 | -497.54 | -567.47 | -350.8  | -489.23 |
|                                             | $E_{\text{att}}^{\text{m}}/\text{kcal}\cdot\text{mol}^{-1}$ | -9.18   | 16.99   | -11.79  | 33.13   | -55.06  | -24.41  |
|                                             | <i>Total facet</i>                                          | 65.76   | 0.3     | 33.94   | 0       | 0       | 0       |
| <i>area/%</i>                               |                                                             |         |         |         |         |         |         |
| Ethyl acetate + 1,1,2,2-Tetrachloroethylene |                                                             |         |         |         |         |         |         |
| 303.15                                      | $E_{\text{int}}/\text{kcal}\cdot\text{mol}^{-1}$            | -340.57 | -546.33 | -443.65 | -577.15 | -331.91 | -492.70 |
|                                             | $E_{\text{att}}^{\text{m}}/\text{kcal}\cdot\text{mol}^{-1}$ | -10.69  | 31.68   | -20.62  | 35.33   | -57.21  | -23.79  |
|                                             | <i>Total facet</i>                                          | 70.89   | 0.75    | 28.13   | 0.00    | 0.00    | 0.23    |
| <i>area/%</i>                               |                                                             |         |         |         |         |         |         |
| 313.15                                      | $E_{\text{int}}/\text{kcal}\cdot\text{mol}^{-1}$            | -346.58 | -520.61 | -466.83 | -584.29 | -334.31 | -507.84 |
|                                             | $E_{\text{att}}^{\text{m}}/\text{kcal}\cdot\text{mol}^{-1}$ | -9.35   | 25.96   | -16.84  | 36.97   | -56.94  | -21.07  |
|                                             | <i>Total facet</i>                                          | 73.71   | 0.36    | 25.80   | 0.00    | 0.00    | 0.12    |
| <i>area/%</i>                               |                                                             |         |         |         |         |         |         |
| 323.15                                      | $E_{\text{int}}/\text{kcal}\cdot\text{mol}^{-1}$            | -350.65 | -498.08 | -486.15 | -586.70 | -347.85 | -528.24 |
|                                             | $E_{\text{att}}^{\text{m}}/\text{kcal}\cdot\text{mol}^{-1}$ | -8.44   | 20.95   | -13.68  | 37.53   | -55.39  | -17.40  |
|                                             | <i>Total facet</i>                                          | 75.22   | 0.24    | 23.78   | 0.00    | 0.00    | 0.75    |
| <i>area/%</i>                               |                                                             |         |         |         |         |         |         |

**Table S2** Crystal planes energies and area ratios of  $\epsilon$ -CL-20 in ternary solvents at different temperatures

| <i>T/K</i>                                     |                                                             | (1 1 0) | (0 0 1) | (1 1 -1) | (0 1 1) | (2 0 0) | (2 0 -1) |
|------------------------------------------------|-------------------------------------------------------------|---------|---------|----------|---------|---------|----------|
| Ethyl acetate + Chlorobenzene + Dibromomethane |                                                             |         |         |          |         |         |          |
| 303.15                                         | $E_{\text{int}}/\text{kcal}\cdot\text{mol}^{-1}$            | -327.26 | -510.09 | -410.67  | -502.68 | -330.64 | -470.59  |
|                                                | $E_{\text{att}}^{\text{m}}/\text{kcal}\cdot\text{mol}^{-1}$ | -13.66  | 23.63   | -26.01   | 18.12   | -57.35  | -27.76   |

|                                                              |                                                             |              |         |         |         |         |         |         |
|--------------------------------------------------------------|-------------------------------------------------------------|--------------|---------|---------|---------|---------|---------|---------|
|                                                              | <i>Total</i>                                                | <i>facet</i> | 58.36   | 0.00    | 0.00    | 35.17   | 0.00    | 6.47    |
|                                                              | <i>area/%</i>                                               |              |         |         |         |         |         |         |
| 313.15                                                       | $E_{\text{int}}/\text{kcal}\cdot\text{mol}^{-1}$            |              | -330.53 | -498.88 | -425.50 | -491.35 | -345.99 | -501.80 |
|                                                              | $E_{\text{att}}^{\text{m}}/\text{kcal}\cdot\text{mol}^{-1}$ |              | -12.93  | 21.13   | -23.59  | 15.57   | -55.61  | -22.15  |
|                                                              | <i>Total</i>                                                | <i>facet</i> | 59.29   | 0.00    | 0.00    | 35.73   | 0.00    | 4.98    |
|                                                              | <i>area/%</i>                                               |              |         |         |         |         |         |         |
| 323.15                                                       | $E_{\text{int}}/\text{kcal}\cdot\text{mol}^{-1}$            |              | -337.83 | -486.00 | -430.39 | -483.06 | -352.86 | -524.03 |
|                                                              | $E_{\text{att}}^{\text{m}}/\text{kcal}\cdot\text{mol}^{-1}$ |              | -11.30  | 18.27   | -22.74  | 13.59   | -54.82  | -18.12  |
|                                                              | <i>Total</i>                                                | <i>facet</i> | 64.03   | 0.00    | 0.00    | 33.47   | 0.00    | 2.50    |
|                                                              | <i>area/%</i>                                               |              |         |         |         |         |         |         |
| <hr/>                                                        |                                                             |              |         |         |         |         |         |         |
| Ethyl acetate + Dibromomethane + 1,1,2,2-Tetrachloroethylene |                                                             |              |         |         |         |         |         |         |
| 303.15                                                       | $E_{\text{int}}/\text{kcal}\cdot\text{mol}^{-1}$            |              | -340.32 | -514.13 | -488.91 | -556.38 | -332.56 | -493.61 |
|                                                              | $E_{\text{att}}^{\text{m}}/\text{kcal}\cdot\text{mol}^{-1}$ |              | -10.75  | 24.50   | -13.27  | 30.53   | -57.13  | -23.62  |
|                                                              | <i>Total</i>                                                | <i>facet</i> | 66.71   | 0.39    | 32.90   | 0.00    | 0.00    | 0.00    |
|                                                              | <i>area/%</i>                                               |              |         |         |         |         |         |         |
| 313.15                                                       | $E_{\text{int}}/\text{kcal}\cdot\text{mol}^{-1}$            |              | -349.09 | -492.29 | -500.54 | -574.52 | -337.92 | -510.79 |
|                                                              | $E_{\text{att}}^{\text{m}}/\text{kcal}\cdot\text{mol}^{-1}$ |              | -8.79   | 19.67   | -11.33  | 34.72   | -56.52  | -20.54  |
|                                                              | <i>Total</i>                                                | <i>facet</i> | 64.14   | 0.29    | 35.57   | 0.00    | 0.00    | 0.00    |
|                                                              | <i>area/%</i>                                               |              |         |         |         |         |         |         |
| 323.15                                                       | $E_{\text{int}}/\text{kcal}\cdot\text{mol}^{-1}$            |              | -353.86 | -484.79 | -503.86 | -587.80 | -350.83 | -520.21 |
|                                                              | $E_{\text{att}}^{\text{m}}/\text{kcal}\cdot\text{mol}^{-1}$ |              | -7.72   | 18.00   | -10.81  | 37.79   | -55.05  | -18.84  |
|                                                              | <i>Total</i>                                                | <i>facet</i> | 62.74   | 0.05    | 37.22   | 0.00    | 0.00    | 0.00    |
|                                                              | <i>area/%</i>                                               |              |         |         |         |         |         |         |
| <hr/>                                                        |                                                             |              |         |         |         |         |         |         |

## References

- [S1] H. Bazaki, S. Kawabe, H. Miya, T. Kodama, Synthesis and Sensitivity of Hexanitrohexaaza-isowurtzitane (HNIW), Propellants, Explos., Pyrotech. 23 (1998) 333-336.
